# Supplementary material for: Transplacental Transport of Artificial Sweeteners
Source: MDPI journal article supplement (doi:10.3390/nu15092063), 2023-04-25
Supplement: s1 [file s1]

# Transplacental Transport of Artificial Sweeteners

Magnus Leth-Møller <sup>1,2,3,\*</sup>, Christina Søndergaard Duvald <sup>2</sup>, Sofie Stampe <sup>1,2</sup>, Eva Greibe <sup>3,4</sup>, Elke Hoffmann-Lücke <sup>3,4</sup>, Michael Pedersen <sup>2</sup> and Per Glud Ovesen <sup>1,3,5,\*</sup>

**Table S1.** Association between maternal plasma concentration (ng/mL) dependent on time from ingestion of drink to maternal blood sample (minutes).

| Artificial sweetener | Coefficient (95% CI)  |
|----------------------|-----------------------|
| Acesulfame           | −2.36 (−3.87 ; −0.84) |
| Cyclamate            | −0.06 (−0.24 ; 0.12)  |
| Saccharin            | −0.52 (−0.79 ; −0.26) |
| Sucralose            | −0.10 (−0.27 ; 0.06)  |

Coefficients are calculated using linear regression and are unadjusted.

**Table S2.** Association between amniotic fluid concentrations of each sweetener (ng/mL) dependent on time from intake of drink to amniotic fluid sampling (minutes).

| Artificial sweetener | Coefficient (95% CI) |
|----------------------|----------------------|
| Acesulfame           | 3.87 (1.50 ; 6.23)   |
| Cyclamate            | 0.10 (0.04 ; 0.17)   |
| Saccharin            | 0.14 (−0.08 ; 0.36)  |
| Sucralose            | 0.12 (−0.01 ; 0.25)  |

Coefficients are calculated using linear regression and are unadjusted.

**Table S3.** Mean concentration (95% CI) of each sweetener (ng/mL) in amniotic fluid samples in samples recorded as contaminated or non-contaminated.

|            | Contaminated (n = 8)     | Non-contaminated (n = 19) |
|------------|--------------------------|---------------------------|
| Acesulfame | 360.26 (110.68 ; 609.85) | 244.63 (−13.45 ; 502.11)  |
| Cyclamate  | 12.16 (6.23 ; 18.10)     | 11.83 (−2.08 ; 25.74)     |
| Saccharin  | 41.38 (22.36 ; 60.40)    | 38.27 (−0.03 ; 76.57)     |
| Sucralose  | 8.28 (−1.63 ; 18.20)     | 6.26 (−8.54 ; 21.06)      |

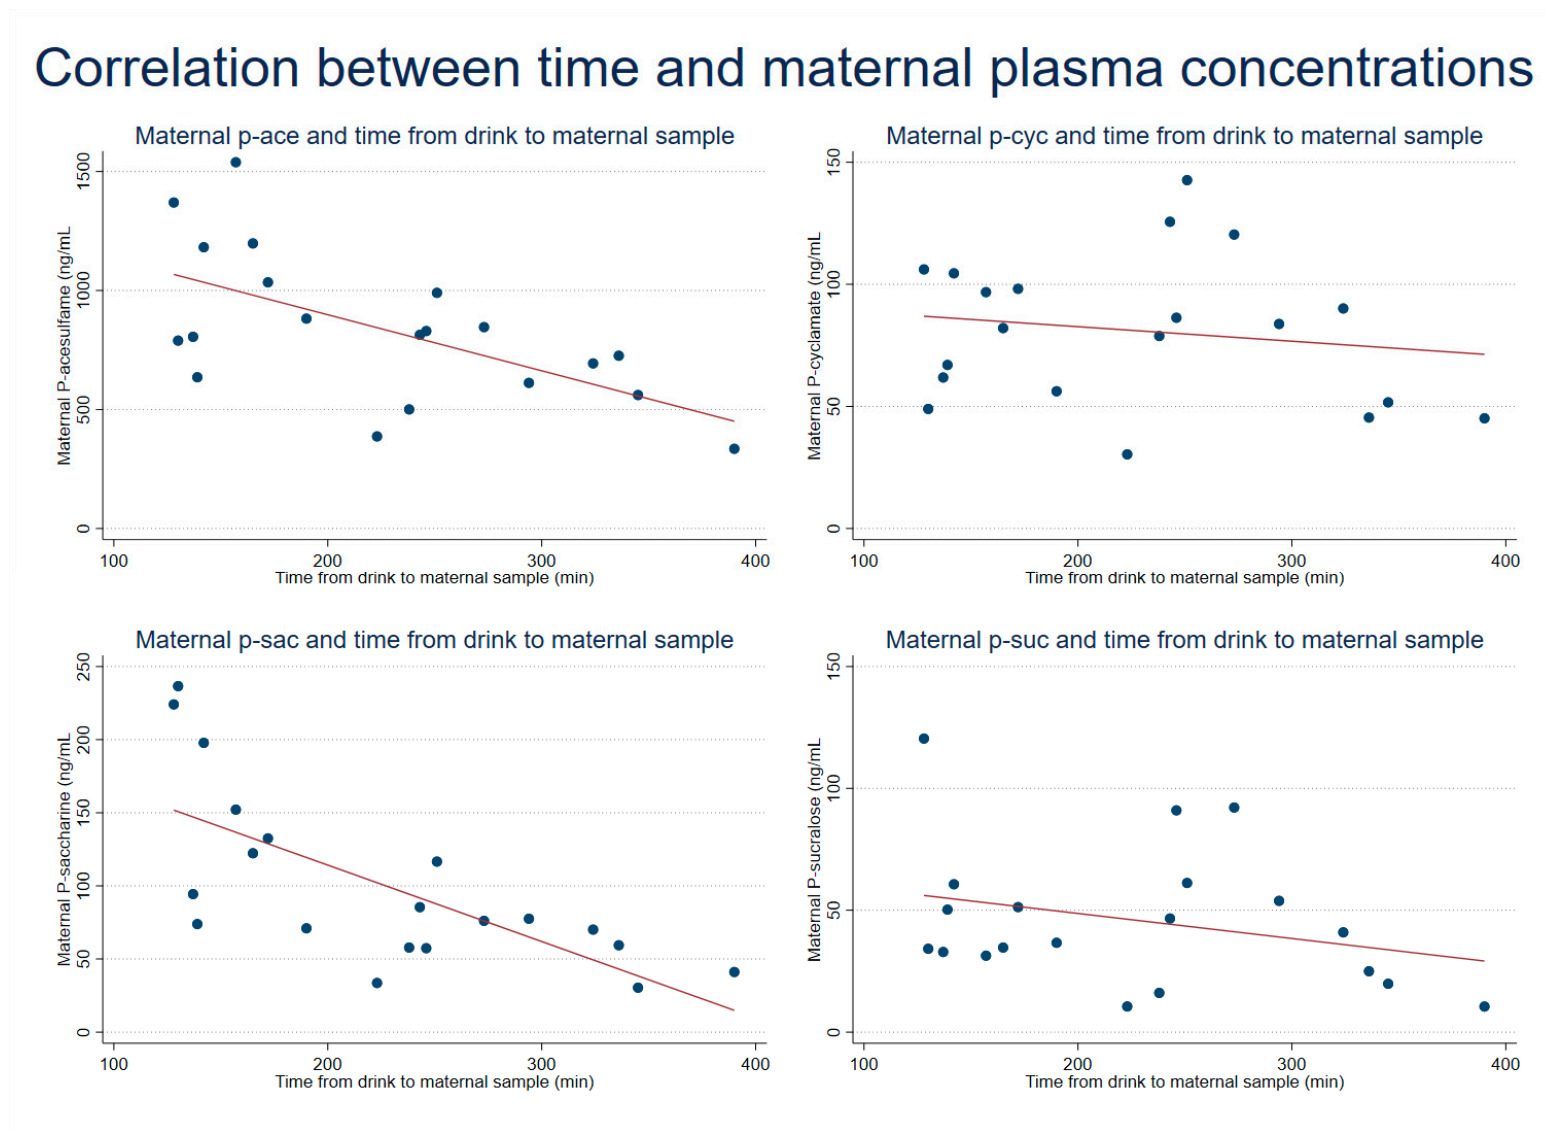

**Figure S1.** Correlation between time from ingestion of drink and maternal plasma concentration of each sweetener.

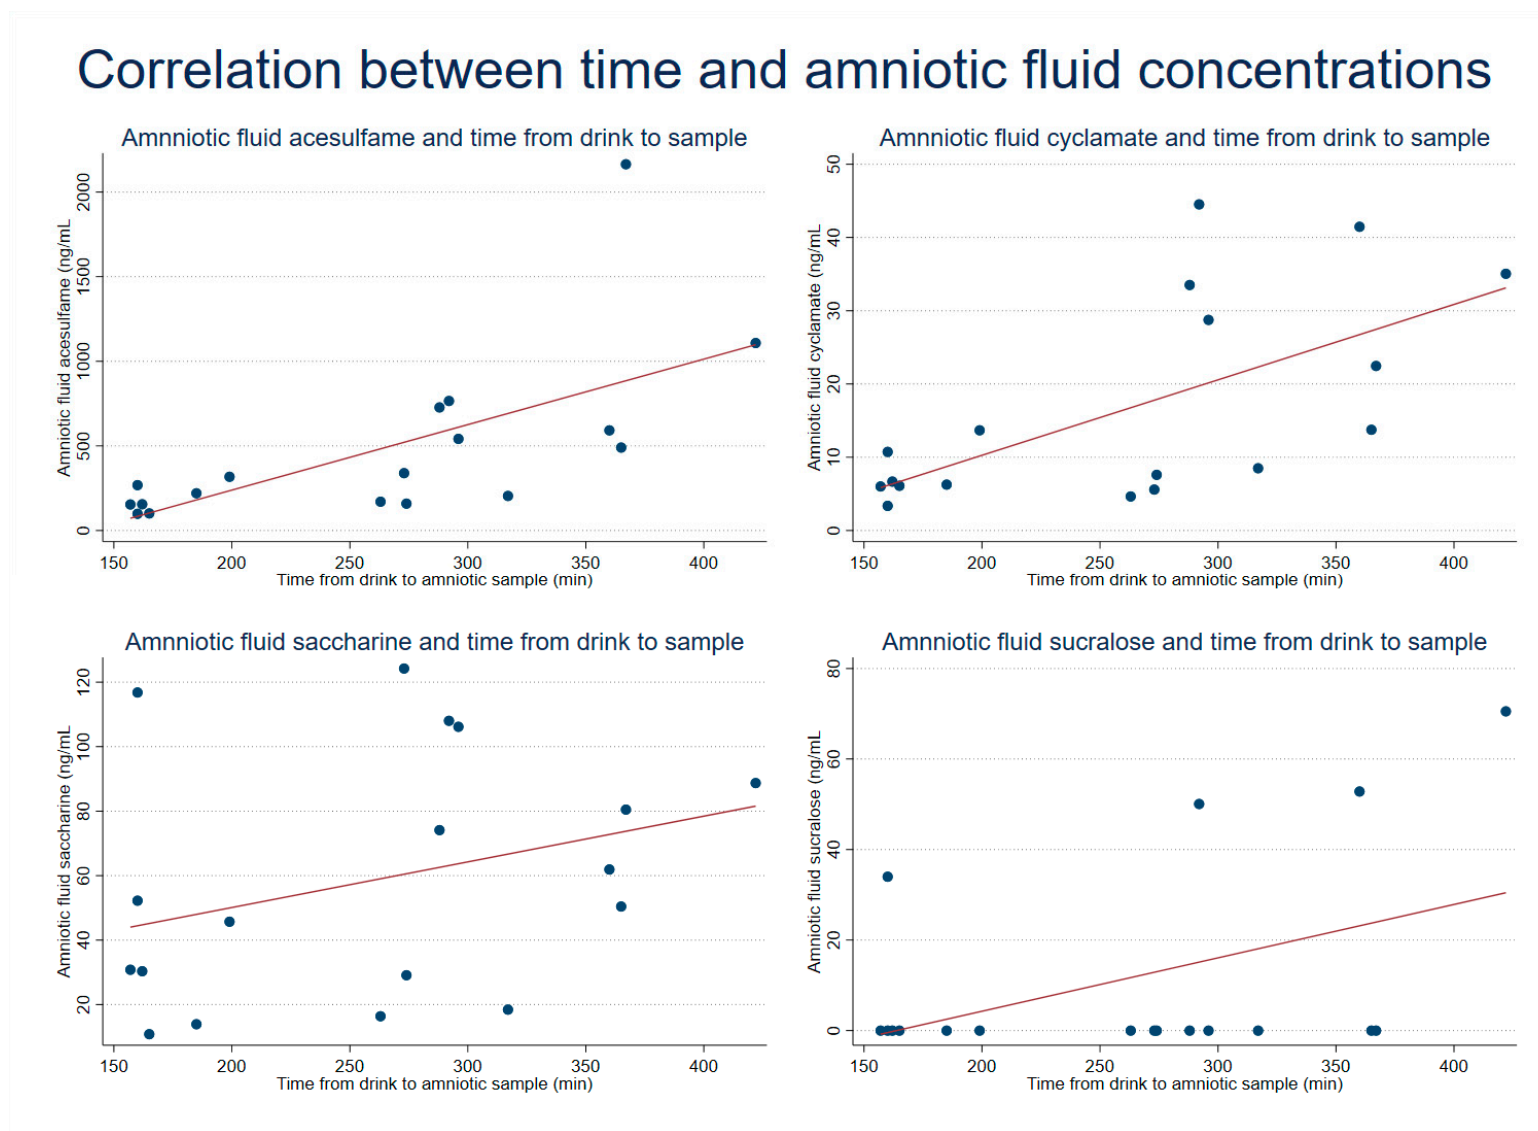

**Figure S2.** Association between time from ingestion of drink and amniotic fluid sampling and amniotic fluid concentration of each sweetener.
